# Supplementary material
Source: PubMed Central journal article supplement (PMC4356813)
Supplement: AAC.05122-14_zac004153826so1.pdf [file AAC.05122-14_zac004153826so1.pdf]

**Bis-benzimidazole hits against *Naegleria fowleri* discovered with new high throughput screens**

Christopher A. Rice,<sup>\*1</sup> Beatrice L. Colon,<sup>\*2</sup> Mehmet Alp,<sup>3</sup> Hakan Göker,<sup>3</sup> David W. Boykin<sup>4</sup> and Dennis E. Kyle<sup>1</sup>

<sup>1</sup>Department of Global Health, College of Public Health, University of South Florida, Tampa, FL

<sup>2</sup>Morsani College of Medicine, University of South Florida, Tampa, FL

<sup>3</sup>Department of Pharmaceutical Chemistry, Faculty of Pharmacy, Ankara University, 06100 Tandogan, Ankara, Turkey

<sup>4</sup>Department of Chemistry, Georgia State University, Atlanta, GA

RUNNING TITLE: Bis-benzimidazole analogs for *N. fowleri*

\* These authors contributed equally to this work.

Address correspondence to Dennis E. Kyle, [dkyle@health.usf.edu](mailto:dkyle@health.usf.edu)

**Table S1.** *In vitro* activity of Furamide derivatives against *Naegleria fowleri*.

| Code   | X | A  | B  | C  | D  | R <sub>1</sub>                     | R <sub>2</sub>                     | <i>N. f.</i><br>IC50<br>( $\mu$ M) |
|--------|---|----|----|----|----|------------------------------------|------------------------------------|------------------------------------|
| DB75   |   | CH | CH | CH | CH | Am                                 | Am                                 | 69.8                               |
| DB103  |   | CH | CH | CH | CH | THP                                | THP                                | 47.4                               |
| DB569  |   | CH | CH | CH | CH | <i>N</i> -Ph-Am                    | <i>N</i> -Ph-Am                    | 46.9                               |
| DB568  |   | CH | CH | CH | CH | <i>N</i> -4-MeOPh-Am               | <i>N</i> -4-MeOPh-Am               | 83.3                               |
| DB573  |   | CH | CH | CH | CH | <i>N</i> -Me <i>N'</i> -4-MeOPh-Am | <i>N</i> -Me <i>N'</i> -4-MeOPh-Am | 31.7                               |
| DB574  |   | CH | CH | CH | CH | <i>N</i> -4-MePh-Am                | <i>N</i> -4-MePh-Am                | 32.6                               |
| DB820  |   | CH | N  | CH | CH | Am                                 | Am                                 | 84.2                               |
| DB829  |   | CH | N  | N  | CH | Am                                 | Am                                 | >50                                |
| DB351  |   | CH | CH | CH | CH | Am                                 | Am                                 | 68.6                               |
| DB1213 |   | CH | CH | CH | CH | Am                                 | Am                                 | 74.9                               |
| DB1237 |   | CH | N  | N  | CH | Am                                 | Am                                 | 62.5                               |
| DB1404 |   | CH | CH | CH | CH | Am                                 | Am                                 | 55.7                               |
| DB1210 |   | CH | CH | CH | CH | Am                                 | Am                                 | 77.1                               |
| DB1044 |   | CH | CH | CH | CH | Am                                 | Am                                 | 45.8                               |

**Table S2.** *In vitro* activity of Linear Benzimidazole Types against *Naegleria fowleri*.

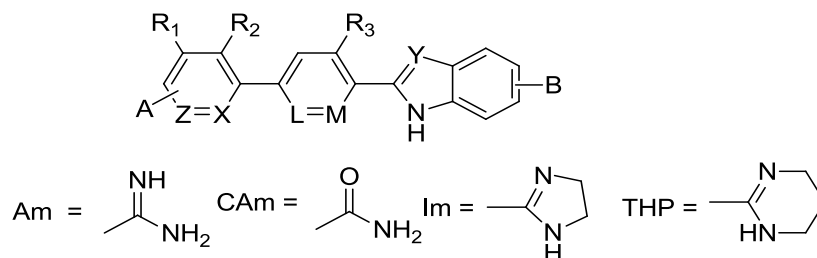

| Code   | X  | Y  | Z  | L  | M  | R <sub>1</sub> | R <sub>2</sub> | R <sub>3</sub> | A             | B     | <i>N. f.</i> IC <sub>50</sub><br>(μM) |
|--------|----|----|----|----|----|----------------|----------------|----------------|---------------|-------|---------------------------------------|
| DB921  | CH | N  | CH | CH | CH | H              | H              | H              | <i>p</i> -Am  | 3-Am  | 58.7                                  |
| DB1055 | CH | N  | CH | CH | CH | H              | H              | H              | <i>m</i> -Am  | 3-Am  | 41.6                                  |
| DB1963 | CH | N  | CH | CH | CH | H              | H              | H              | <i>p</i> -CAm | 3-Am  | 78.5                                  |
| DB1964 | CH | N  | CH | CH | CH | H              | H              | H              | <i>p</i> -CAm | 3-Im  | ND                                    |
| DB988  | CH | N  | CH | CH | CH | H              | Me             | H              | <i>p</i> -Am  | 3-Am  | 13.4                                  |
| DB1236 | CH | N  | CH | CH | CH | H              | H              | F              | <i>p</i> -Am  | 3-Am  | 59.4                                  |
| DB1883 | CH | CH | CH | CH | CH | H              | H              | H              | <i>p</i> -Am  | 3-Am  | 61.8                                  |
| DB1944 | CH | CH | CH | CH | CH | H              | H              | H              | H             | 3-Am  | 55.5                                  |
| DB1803 | CH | CH | CH | CH | CH | H              | H              | H              | <i>p</i> -Im  | 3-Im  | 55.7                                  |
| DB1804 | CH | CH | CH | CH | CH | H              | H              | H              | <i>p</i> -THP | 3-THP | 17.3                                  |
| DB1798 | CH | CH | CH | CH | CH | H              | H              | H              | <i>p</i> -Am  | 4-Am  | 36.6                                  |
| DB1780 | CH | CH | CH | CH | CH | H              | H              | H              | <i>p</i> -Im  | 4-Im  | 66.5                                  |
| DB1781 | CH | CH | CH | CH | CH | H              | H              | H              | <i>p</i> -THP | 4-THP | 8.66                                  |

**Table S3.** *In vitro* activity of central indole ring diamidines against *Naegleria fowleri*.

| Code   | L | Ar | <i>N. f.</i> IC50<br>( $\mu$ M) |
|--------|---|----|---------------------------------|
| DB1884 |   |    | 43.2                            |
| DB1902 |   |    | 50.8                            |
| DB1885 |   |    | >50                             |
| DB1887 |   |    | 10.3                            |
| DB1476 |   |    | 25.5                            |
| DB2285 |   |    | >50                             |

**Table S4.** *In vitro* activity of arylimidamide derivatives against *Naegleria fowleri*.

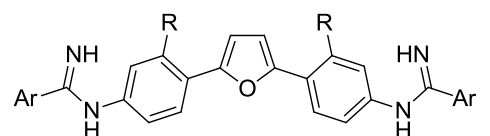

| Code                | R                  | Ar                                                                                  | <i>N. f.</i> IC <sub>50</sub> (μM) |
|---------------------|--------------------|-------------------------------------------------------------------------------------|------------------------------------|
| DB745               | OEt                |    | 18.6                               |
| DB766 <sup>a</sup>  | <i>O-i</i> -Pr     |    | 12.5                               |
| DB1960 <sup>b</sup> | <i>O-i</i> -Pr     |    | 22.7                               |
| DB1852 <sup>a</sup> | <i>O-c</i> -pentyl |    | 25.7                               |
| DB1955 <sup>b</sup> | <i>O-c</i> -pentyl |    | 37.9                               |
| DB1831              | <i>O-i</i> -Pr     |   | >50                                |
| DB1931              | <i>O-i</i> -Pr     |  | >50                                |
| DB1850              | <i>O-i</i> -Pr     |  | 47.5                               |
| DB1858              | <i>O-i</i> -Pr     |  | >50                                |
| DB1857              | <i>O-i</i> -Pr     |  | 57.6                               |
| DB1848              | <i>O-i</i> -Pr     |  | 50.6                               |

a) Hydrochloride salt; b) mesylate salt

**Table S5.** *In vitro* activity of additional arylimidamide derivatives against *Naegleria fowleri*.

| Code   | Structure                                                                         | <i>N. f.</i> IC <sub>50</sub> (μM) |
|--------|-----------------------------------------------------------------------------------|------------------------------------|
| DB1835 | 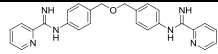 | >50                                |
| DB1969 |  | >50                                |
| DB1832 |  | >50                                |

**Figure S1.** Optimization of alamarBlue and CTG assays for *Naegleria fowleri* drug discovery. A,B) First the optimal seeding density of amoebae/well was determined in 96 and 384 well plates. C,D) The alamarBlue colorimetric readout was robust and reproducible. E,F) There was a strong correlation between luminescence (RLUs) in CTG assay with number of amoebae/well.

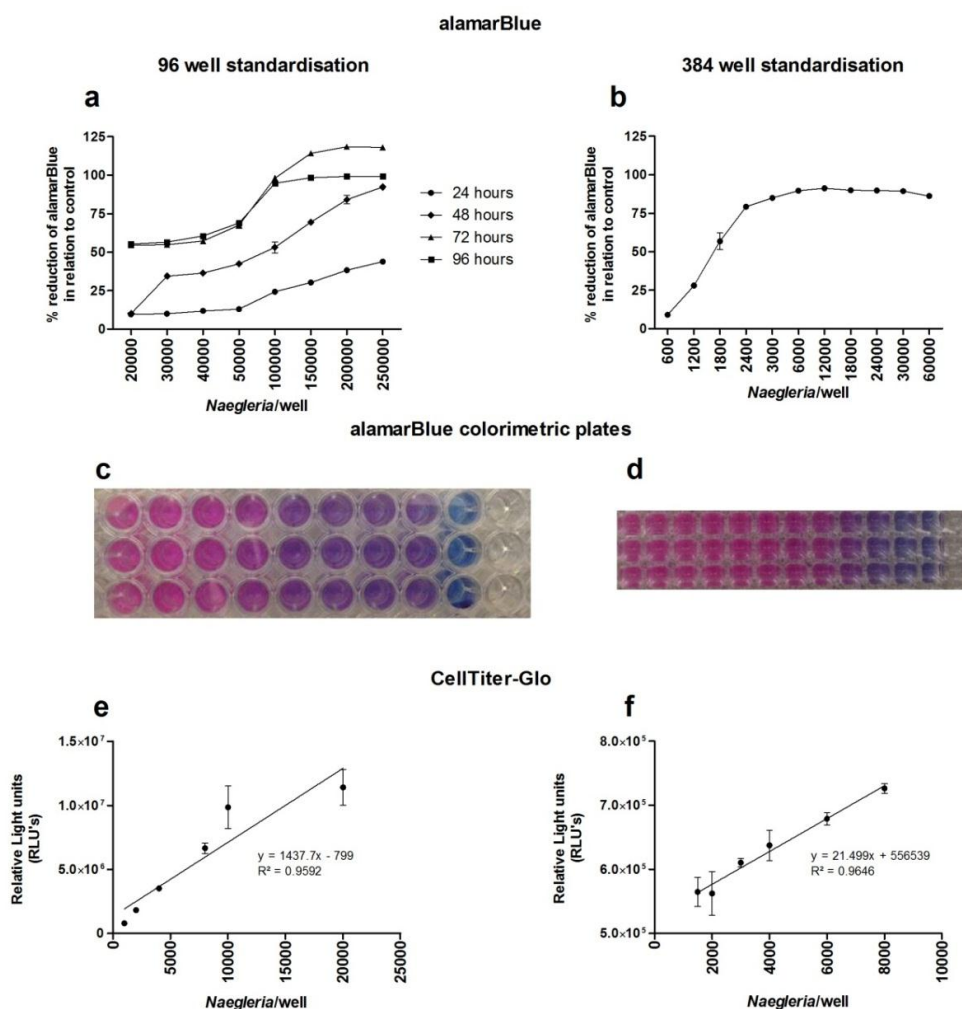

**Table S6.** Comparative potency and cytotoxicity of amidino derivatives against *Naegleria fowleri*, bacteria, fungi, and Rat myoblast *in vitro*.

| Compounds*                                    | Current Study                 |                       |       | Bacteria<br>(MIC, µg/ml)                |                                            |                               | Fungi<br>(IC50, µg/ml)  |                                | Parasites<br>(IC50, µg/ml) |                              | Rat<br>Myoblast       | Ref.  |    |
|-----------------------------------------------|-------------------------------|-----------------------|-------|-----------------------------------------|--------------------------------------------|-------------------------------|-------------------------|--------------------------------|----------------------------|------------------------------|-----------------------|-------|----|
|                                               | <i>N. f.</i><br>IC50<br>(µM)* | J774<br>IC50<br>(µM)* | SI    | <i>Staphylococcus aureus</i> ATCC 29213 | <i>Staphylococcus pneumoniae</i> ATCC 6301 | <i>E. faecalis</i> ATCC 51575 | <i>Candida albicans</i> | <i>Cryptococcus neoformans</i> | <i>Trypanosoma brucei</i>  | <i>Plasmodium falciparum</i> | L6<br>IC50<br>(µg/ml) |       |    |
| <b>Hits</b>                                   | DB173                         | 0.177                 | 7.89  | 44.6                                    |                                            |                               |                         |                                |                            |                              |                       | 46    |    |
|                                               | DB183                         | 0.458                 | 6.47  | 14.2                                    |                                            |                               |                         |                                |                            |                              |                       | 38,46 |    |
|                                               | DB210                         | 0.795                 | 64.9  | 81.6                                    |                                            |                               |                         |                                |                            |                              |                       | 38,46 |    |
|                                               | DB1766                        | 0.43                  | 6.92  | 16.1                                    | 1                                          | 0.12                          | 0.25                    | 3.12                           | 1.56                       | 0.017                        | 0.013                 | 4.2   | 25 |
| <b>Marginal Hits</b>                          | HG17                          | 0.318                 | 2.91  | 9.2                                     |                                            |                               |                         | 25                             |                            | 0.06                         | 0.008                 | >90   | 38 |
|                                               | HG24                          | 0.462                 | 2.54  | 9.15                                    |                                            |                               |                         | 3.12                           |                            | 0.036                        | 0.015                 | 29.4  | 38 |
|                                               | DB1684                        | 1.04                  | 9.58  | 9.2                                     | 1                                          | 0.12                          | .5                      |                                |                            |                              |                       |       | 25 |
|                                               | DB1734                        | 0.385                 | 3.22  | 8.4                                     | 0.25                                       | ≤0.06                         | 0.25                    |                                |                            |                              |                       |       | 23 |
|                                               | DB1736                        | 1.035                 | 10.2  | 9.8                                     | 0.25                                       | ≤0.06                         | 0.12                    |                                |                            |                              |                       |       | 25 |
| <b>Compounds not active against <i>Nf</i></b> | DB1754                        | 10.2                  | 15.5  | 1.5                                     | 0.25                                       | 0.12                          | 0.5                     | 4                              |                            |                              |                       |       | 23 |
|                                               | DB1767                        | 7.06                  | 37.1  | 5.3                                     | 0.5                                        | 0.25                          | 0.5                     | 16                             |                            |                              |                       |       | 23 |
|                                               | DB1768                        | 9.44                  | 24.2  | 2.6                                     | 0.25                                       | 0.12                          | 0.5                     | 4                              |                            |                              |                       |       | 23 |
|                                               | HK11                          | 17.2                  | 31.8  | 1.84                                    |                                            |                               |                         | 25                             |                            | 0.33                         | 0.015                 | 29.8  | 38 |
|                                               | HK12                          | 41.3                  | 23.9  | 0.58                                    |                                            |                               |                         | 1.56                           |                            | 1.06                         | 0.031                 | 13    | 38 |
|                                               | HK16                          | >88.2                 | >88.2 | ~1                                      |                                            |                               |                         | 50                             |                            | 0.59                         | 0.017                 | 25.5  | 38 |
|                                               | HK23                          | >80.0                 | 28.4  | ~0.35                                   |                                            |                               |                         | 25                             |                            | 0.708                        | 0.028                 | 46    | 38 |

\* Hits are defined as compounds having an IC50 < 1 µM for *Naegleria fowleri* (*N.f.*) and a selectivity index (SI) ≥ 10; Marginal hits are defined as having an IC50 ~1 for *N.f.* and a SI > 8 and < 10; Inactive compounds have an IC50 > 1 µM for *N.f.*
